# Supplementary material for: Strain tunable nanoporous r-N-GDY membrane for efficient seawater desalination
Source: Royal Society of Chemistry journal article supplement (doi:10.1039/d2ta04108a), 2022-01-01
Supplement: d2ta04108a1.pdf [file d2ta04108a1.pdf]

## Supporting Information

### **Strain tunable nanoporous r-N-GDY membrane for efficient seawater desalination**

Min Li<sup>a</sup>, Yixiang Li<sup>a</sup>, Yunju Zhang<sup>a</sup>, Yong-Qiang Li<sup>a</sup>, Weifeng Li<sup>a,\*</sup>, Mingwen Zhao<sup>a,\*</sup>,  
Yuanyuan Qu<sup>a,\*</sup>

<sup>a</sup>School of Physics, Shandong University, Jinan, Shandong, 250100, China

Correspondence authors. Email: [lwf@sdu.edu.cn](mailto:lwf@sdu.edu.cn) (W. Li), [zmw@sdu.edu.cn](mailto:zmw@sdu.edu.cn) (M. Zhao),  
[quyuanyuan@sdu.edu.cn](mailto:quyuanyuan@sdu.edu.cn) (Y. Qu).

## Supplementary Figures

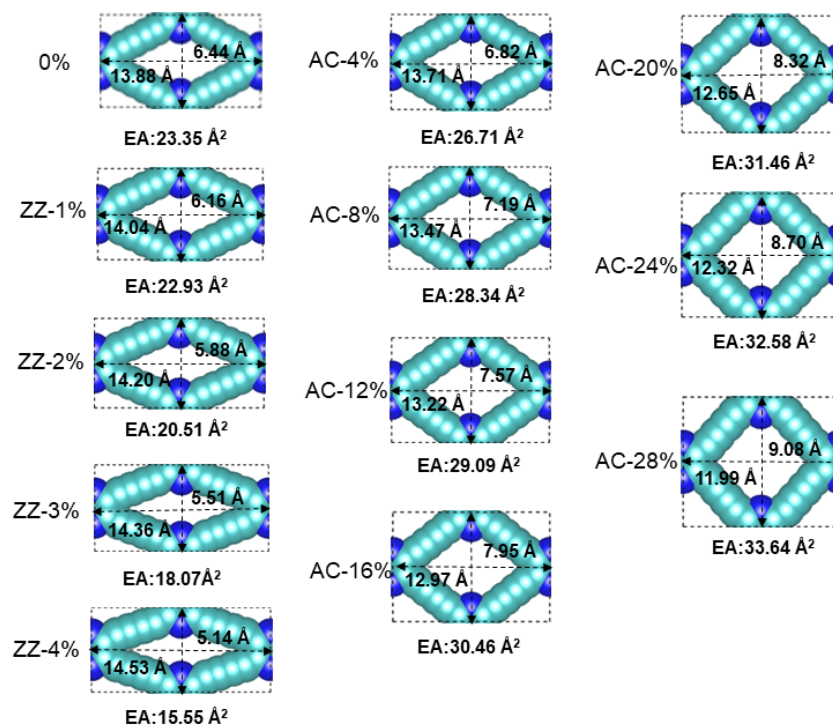

**Figure S1.** The pore sizes and EA under different tensile strains.

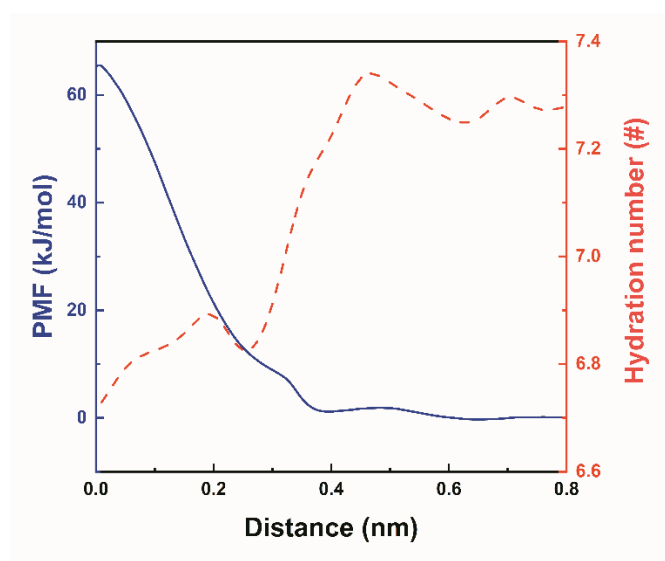

**Figure S2.** The hydration numbers for the first hydration shells (dashed red line) compared with the PMF profile (solid blue line) for Cl<sup>-</sup> translocating the nanopores.

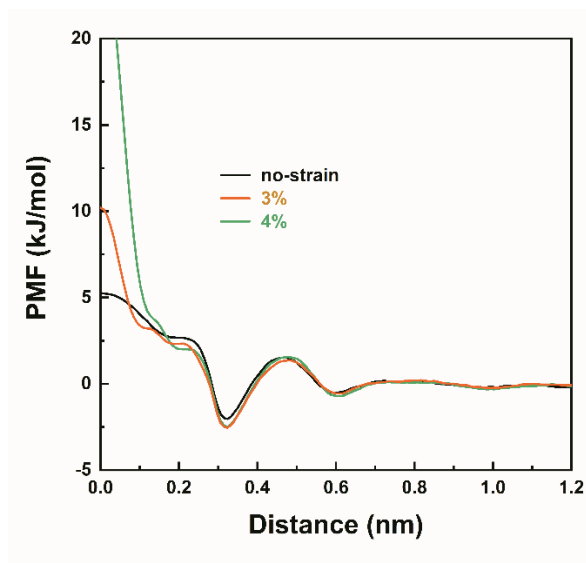

**Figure S3.** Potential of mean force (PMF) for H<sub>2</sub>O translocating the nanopore of the r-N-GDY membrane under the no-strain system, and under 3%, 4% strain along the ZZ direction. The r-N-GDY membrane is placed at 0 nm.

### Supplementary Tables

**Table S1.** Atomic charges for the r-N-GDY membrane.

| Atom | Q (e) | $\sigma$ (nm) | $\epsilon$ (kJ/mol) |
|------|-------|---------------|---------------------|
| C1   | 0.35  | 0.339967      | 0.359824            |
| C2   | -0.16 | 0.339967      | 0.878640            |
| C3   | 0.04  | 0.339967      | 0.877640            |
| N    | -0.46 | 0.325000      | 0.711280            |

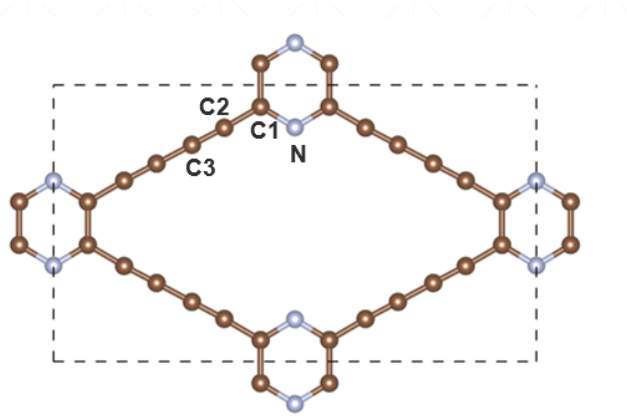

## Supplementary Methods

### Formulae for calculating salt rejection, water flux and water permeability

The salt rejection rate ( $R$ ) is evaluated by the following formula:

$$R = \left(1 - \frac{N_p}{N_0}\right) \times 100\% \quad \text{Eq. (1)}$$

where  $N_p$  is the number of ions in the pure water region when the seawater concentration doubles (0.8 M), and the  $N_0$  is the total number of ions in the system.

The water flux ( $Q$ ) is calculated by the formula:

$$Q = \frac{N_{t_2} - N_{t_1}}{(t_2 - t_1)S} \quad \text{Eq. (2)}$$

where  $N_{t_2}$  and  $N_{t_1}$  represent the number of water molecules on the pure water side at moments  $t_2$  and  $t_1$  respectively, and  $S$  is the area of the r-N-GDY membrane ( $20.41 \text{ nm}^2 \sim 25.27 \text{ nm}^2$ ).

The water permeability ( $p$ ) is calculated by the formula:

$$p = \frac{mQ}{\rho N_A P} \quad \text{Eq. (3)}$$

where  $Q$  is the water flux,  $m$  is the quality of one mole of water (18 g/mol),  $N_A$  is Avogadro's number,  $\rho$  is the density of water ( $1 \text{ g/cm}^3 = 10^{-3} \text{ g/L}$ ),  $P$  is the pressure drop across the membrane.

### **Method for Fitting parameters of the acetylenic bond**

There is an acetylene bond  $\text{C}\equiv\text{C}$  in the r-N-GDY membrane, which is absent in the amber99sb force field. In order to fit the  $\text{C}\equiv\text{C}$  force field parameters, we constructed H -  $\text{C}\equiv\text{C}$  - H molecule containing  $\text{C}\equiv\text{C}$ . The method we adopted is to use the *GAFF* force field that comes with *antechamber* to generate the correct *LEAP* recognizable *fcomd* parameter file and *mol2* files. Then generate *promtop* and *inpcrd* files that can be recognized by amber. The force field parameters obtained for the C atoms in the  $\text{C}\equiv\text{C}$  are  $\sigma = 0.339967$ ,  $\epsilon = 0.878640$ , respectively.
